# Supplementary material for: Differentiation of patient-specific void urine-derived human induced pluripotent stem cells to fibroblasts and skeletal muscle myocytes
Source: PubMed Central journal article supplement (PMC10036466; doi:10.1038/s41598-023-31780-9), 2023-03-23
Supplement: 41598_2023_31780_MOESM1_ESM.pdf [file 41598_2023_31780_MOESM1_ESM.pdf]

**Supplemental Table S1: Antibody list**

| <b>Primary antibodies</b>               | <b>Company</b> | <b>Catalogue number</b> | <b>Host species</b> | <b>Clonality</b> | <b>Dilution</b> |
|-----------------------------------------|----------------|-------------------------|---------------------|------------------|-----------------|
| OCT4                                    | Thermo Fisher  | PA5-27438               | rabbit              | polyclonal       | 1:100           |
| SOX2                                    | R&D Systems    | MAB2018                 | mouse               | IgG2a            | 1:100           |
| NANOG                                   | ReproCell      | RCAB002P-F              | rabbit              | polyclonal       | 1:10            |
| TUBB3                                   | R&D Systems    | MAB1195                 | mouse               | IgG2a            | 1:100           |
| HNF-3B                                  | R&D Systems    | AF2400                  | goat                | polyclonal       | 1:100           |
| $\alpha$ SMA                            | DAKO           | M0851                   | mouse               | IgG2a            | 1:100           |
| FSP1                                    | DSHB           | CPTC-S100A4-3           | mouse               | IgG2c            | 1:50            |
| TE7                                     | Millipore      | CBL271                  | mouse               | IgG1             | 1:100           |
| Vinculin                                | Sigma          | V9131                   | mouse               | IgG1             | 1:100           |
| Vimentin                                | Santa Cruz     | sc-7558                 | goat                | polyclonal       | 1:50            |
| Fibronectin                             | Santa Cruz     | SC-8422                 | mouse               | IgG1             | 1:150           |
| Paxillin                                | BD Biosciences | 612405                  | mouse               | IgG1             | 1:100           |
| T antigen (brachyury)                   | Santa Cruz     | sc-17743                | goat                | polyclonal       | 1:100           |
| PAX7                                    | DSHB           | PAX7-c                  | mouse               | IgG1             | 1:200           |
| MYOD                                    | DAKO           | M3512                   | mouse               | IgG1             | 1:50            |
| MYOG (myogenin)                         | Santa Cruz     | sc-52903                | mouse               | IgG1             | 1:100           |
| MF20                                    | DSHB           | AB2147781               | mouse               | IgG2b            | 1:200           |
| NCAM1(CD56)                             | DAKO           | M7304                   | mouse               | IgG1             | 1:100           |
| TITIN                                   | DSHB           | 9D10-c                  | mouse               | IgM              | 1:100           |
| DESMIN                                  | DAKO           | M0760                   | mouse               | IgG1             | 1:100           |
| TNNT3                                   | DSHB           | JLT12-s                 | mouse               | IgG1             | 1:100           |
| hMitochondria                           | Millipore      | MAB1273                 | mouse               | IgG1             | 1:100           |
| hKU80                                   | Cell Signaling | 2180                    | rabbit              | polyclonal       | 1:100           |
| HNK-1(CD57)                             | DSHB           | 1C10                    | mouse               | IgG1             | 1:100           |
| THY1(CD90)                              | Abcam          | ab92574                 | rabbit              | polyclonal       | 1:500           |
| SM-MHC                                  | Santa Cruz     | sc-6956                 | mouse               | IgG1             | 1:100           |
| ERK2                                    | Santa Cruz     | sc-154                  | rabbit              | polyclonal       | 1:1000          |
| NCAM(CD56)-PE-Cy7                       | BD Biosciences | 557747                  | mouse               | IgG1             | 1:50            |
| HNK-1(CD57)-PE                          | BioLegend      | 359612                  | mouse               | IgM              | 1:50            |
| <b>Secondary antibodies</b>             |                |                         |                     |                  |                 |
| Anti-Mouse IgG2a, Alexa Fluor 555       | Thermo Fisher  | A-21137                 | goat                | polyclonal       | 1:400           |
| Anti-Mouse IgG (H+L), Alexa Fluor 594   | Thermo Fisher  | A-11032                 | goat                | polyclonal       | 1:400           |
| Anti-Mouse IgG1, Alexa Fluor 568        | Thermo Fisher  | A-21124                 | goat                | polyclonal       | 1:400           |
| Anti-Mouse IgG1, Alexa Fluor 488        | Thermo Fisher  | A-21121                 | goat                | polyclonal       | 1:400           |
| Anti-Mouse IgG2b, Alexa Fluor 488       | Thermo Fisher  | A-21141                 | goat                | polyclonal       | 1:400           |
| Anti-Mouse IgM, Alexa Fluor 568         | Thermo Fisher  | A-21043                 | goat                | polyclonal       | 1:400           |
| Anti-Goat IgG (H+L), Alexa Fluor 488    | Thermo Fisher  | A-11055                 | donkey              | polyclonal       | 1:400           |
| Anti-Rabbit IgG (H+L), Alexa Fluor 488  | Thermo Fisher  | A-21206                 | donkey              | polyclonal       | 1:400           |
| Anti-Rabbit IgG (H+L) Alexa Fluor 568   | Thermo Fisher  | A-10042                 | donkey              | polyclonal       | 1:400           |
| <b>Western Blotting antibodies</b>      |                |                         |                     |                  |                 |
| Anti-Rabbit IgG horse radish peroxidase | GE Healthcare  | NA934V                  | donkey              | polyclonal       | 1:5000          |
| Anti-Mouse IgG horse radish peroxidase  | GE Healthcare  | NA931V                  | sheep               | polyclonal       | 1:5000          |
| <b>Immunohistochemistry antibodies</b>  |                |                         |                     |                  |                 |
| Anti-Mouse IgG, biotinylated            | DAKO           | E0354                   | rabbit              | polyclonal       | 1:300           |
| Anti-Rabbit IgG, biotinylated           | Vector Labs    | BA-1000                 | goat                | polyclonal       | 1:200           |
| Anti-Goat IgG, biotinylated             | DAKO           | E0466                   | rabbit              | polyclonal       | 1:300           |

**Table S2: Primer assay information**

| PrimePCR pluripotency markers |                 | Myogenic differentiation |                            |
|-------------------------------|-----------------|--------------------------|----------------------------|
| Target                        | Unique Assay ID | Primer name              | Sequence                   |
| HPRT-1                        | qHsaCID0016375  | T-FOR                    | GTA CTCCCAATCCTATTCTGACAAC |
| B2M                           | qHsaCID0015347  | T-REV                    | CATTCCAAGGCTGGACCAAT       |
| GAPDH                         | qHsaCED0038674  | Tbx6-FOR                 | GTGTCTTTCCATCGTGTCAAGC     |
| TFRC                          | qHsaCID0022106  | Tbx6-REV                 | TATGCGGGGTTGGTACTTGTG      |
| TBP                           | qHsaCID0007122  | Msgn1-FOR                | AGTCAGGATGTCTGTCCAGC       |
| ALPL                          | qHsaCID0010031  | Msgn1-REV                | AGGTAATTCCGGAGGGTGTG       |
| CCNA2                         | qHsaCID0017452  | Paraxis-FOR              | AGGGCCACGGAGATGAGCCT       |
| CDC42                         | qHsaCID0037936  | Paraxis-REV              | GGTCCCCCGTCCCTACACA        |
| CDK1                          | qHsaCID0036777  | Pax3-FOR                 | AGCTCGGCGGTGTTTTATCA       |
| CHD1                          | qHsaCID0006750  | PAX3-REV                 | CTGCACAGGATCTTGAGACG       |
| CHD7                          | qHsaCID0013442  | Pax7-FOR                 | ACCCCTGCCTAACCACATC        |
| CNOT3                         | qHsaCED0001495  | Pax7-REV                 | GCGGCAAAGAATCTTGAGAC       |
| CRIPTO-1                      | qHsaCED0023686  | Lbx1-FOR                 | CCACTTTCGCCGCTTCTTAGGG     |
| KLF2                          | qHsaCED0005139  | Lbx1-REV                 | ACGTTTAAGGGGCTGGAGGTC      |
| DNMT3B                        | qHsaCED0042577  | Myf5-FOR                 | AATTTGGGGACGAGTTTGTG       |
| FGF2                          | qHsaCID0015510  | Myf5-REV                 | CATGGTGGTGGACTTCCTCT       |
| GDF3                          | qHsaCED0003639  | Myh3-FOR                 | TTGATGCCAAGACGTATTGCT      |
| KAT5                          | qHsaCID0020266  | Myh3-REV                 | GGGGGTTTCATGGCGTACAC       |
| LIN28A                        | qHsaCID0022315  | $\beta$ -actin-FOR       | GCATTGTTACAGGAAGTCCCTTG    |
| NANOG                         | qHsaCED0023824  | $\beta$ -actin-FOR       | CTATCACCTCCCCTGTGTGGA      |
| PRDM14                        | qHsaCID0018592  | HPRT-1-FOR               | TGACTGCGCAAACAATGCA        |
| POU5F1 (OCT4)                 | qHsaCED0038334  | HPRT-1-REV               | GGTCCTTTTACCAGCAAGCT       |
| LEFTY2                        | qHsaCED0045158  | SDHA-FOR                 | TGGGAACAAGAGGGCATCTG       |
| SOX2                          | qHsaCED0036871  | SDHA-REV                 | CCACCACTGCATCAAATTCATG     |
| MYC                           | qHsaCID0012921  | YWHAZ-FOR                | ACTTTTGGTACATTGTGGCTTCAA   |
| PAF1                          | qHsaCED0003366  | YWHAZ-REV                | CCGCCAGGACAAACCAGTAT       |
| RIF1                          | qHsaCID0012192  |                          |                            |
| SALL4                         | qHsaCID0014611  |                          |                            |
| SMAD1                         | qHsaCED0037732  |                          |                            |
| SMAD2                         | qHsaCID0022031  |                          |                            |
| STAT3                         | qHsaCID0010912  |                          |                            |
| TERT                          | qHsaCID0009247  |                          |                            |
| THAP11                        | qHsaCED0019241  |                          |                            |
| TRIM28                        | qHsaCID0021255  |                          |                            |
| UTF1                          | qHsaCED0007920  |                          |                            |
| ZFP42                         | qHsaCID0013010  |                          |                            |

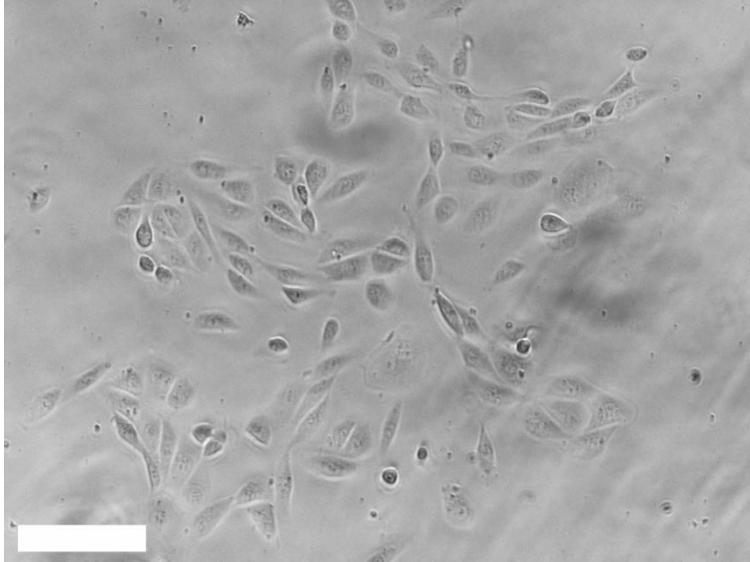

**Figure S1. Cells collected from void-urine samples.** Cells were collected by centrifugation from void-urine samples, plated into uncoated culture plates and cultured in Renal Epithelial Cell medium (ATCC, USA) without antibiotics. Phase-contrast image was taken at day 10 after initial seeding (P0). These cells were used for iPSC reprogramming and derivation of the U1 line. Bar: 100  $\mu\text{m}$ .

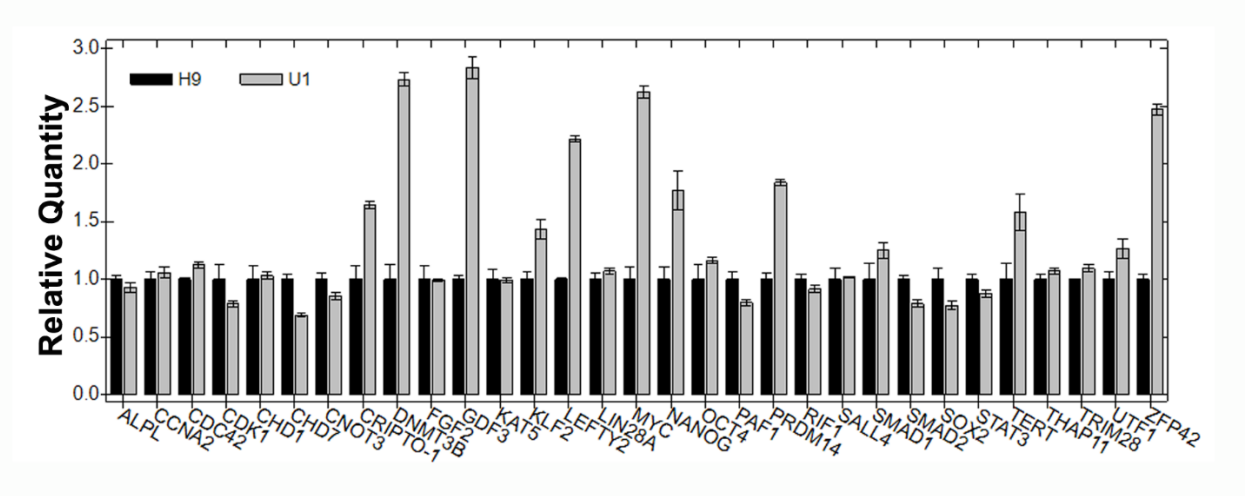

**Figure S2. Real-time RT-qPCR analysis of U1 and H9.** The expression of 37 pluripotency marker genes was tested at one parallel culture of hESC line H9 and iPSC line U1. Standard deviation shows variation of technical replicates. This qualitative analysis demonstrates that all tested pluripotency markers are expressed in the U1 line support immunofluorescence pictures for pluripotency markers in Fig. 1A-G. The hESC line H9 was used as a control to prove similar expression range. Differences in expression levels of individual markers may be passage or iPSC reprogramming related.

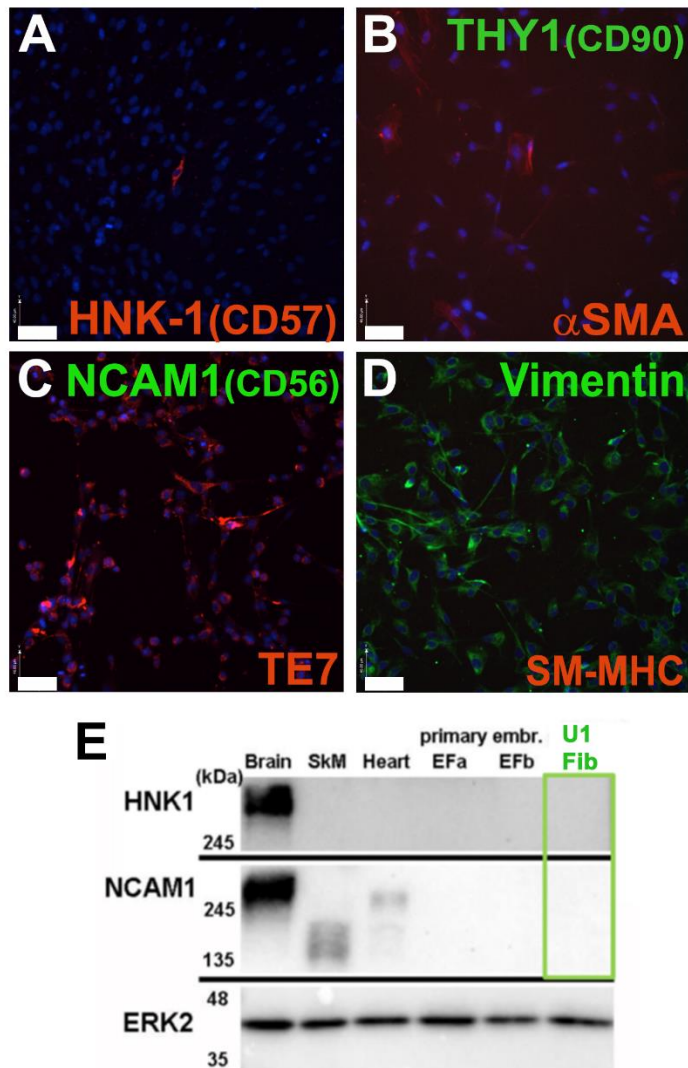

**Figure S3. Purity analysis of *de novo* differentiated U1 fibroblasts.** (A) Immunolabelling of U1 fibroblast shows only individual HNK-1(CD57)-positive neuroectodermal cells in the culture. (B) Co-immunolabeling shows absence of THY1(CD90)-expressing mesenchymal stem cells in fibroblast cultures, and presence of individual  $\alpha$ SMA-positive myofibroblasts. (C) Co-immunolabeling shows absence of neuronal and striated muscle cell marker NCAM1(CD56), in TE7-expressing fibroblast cultures. (D) Cultures show uniform expression of intermediate filament vimentin but absence of smooth muscle myosin heavy chain (SM-MHC). Bar: 40  $\mu$ m. (E)

Western Blot analysis confirming the absence of HNK1 and NCAM1 proteins, revealing high purity of the U1 derived fibroblasts cultures. 50 µg protein per sample were separated by electrophoresis using a 12% polyacrylamide gel and blotted onto a PVDF membrane (Bio-Rad). Membranes were incubated over night at 4°C with HNK-1, NCAM1 and ERK primary antibodies (Supplemental Table S1). After 3 washes, membranes were incubated with a horseradish peroxidase-conjugated secondary antibody, developed by Luminata ECL reagent (Millipore), and visualized on a Chemidoc instrument (Bio-Rad). U1 fibroblast cultures (green box) shows absence of HNK-1 and NCAM1 signals. ERK2 was used as loading control. Human fetal brain, skeletal muscle (SkM), and fetal heart lysates were used as positive controls. The human primary embryonic fibroblast lines EFa and EFb were used as negative controls.
