# Supplementary material for: Differentiation of patient-specific void urine-derived human induced pluripotent stem cells to fibroblasts and skeletal muscle myocytes
Source: PubMed Central journal article supplement (PMC10036466; doi:10.1038/s41598-023-31780-9), 2023-03-23

Western-Blot Raw Data

NCAM1

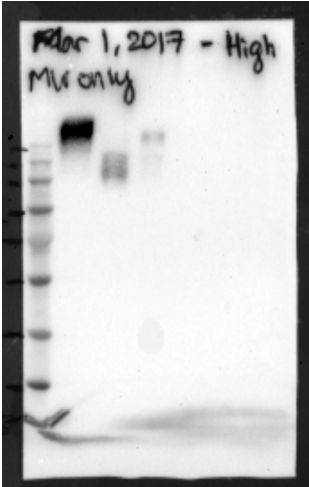

HNK1

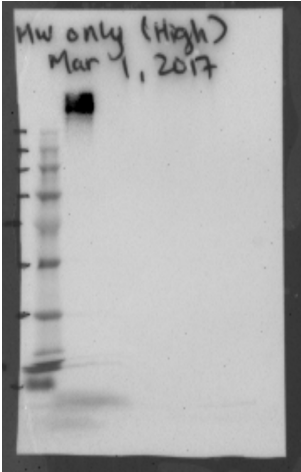

ERK2

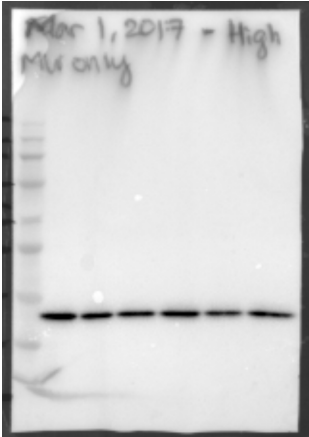

Supplement: 41598_2023_31780_MOESM2_ESM.pdf [file 41598_2023_31780_MOESM2_ESM.pdf]
